# Supplementary material for: Circulatory and Urinary B-Vitamin Responses to Multivitamin Supplement Ingestion Differ between Older and Younger Adults
Source: PubMed Central journal article supplement (PMC7698360; doi:10.3390/nu12113529), 2020-11-17
Supplement: nutrients-12-03529-s001.pdf [file nutrients-12-03529-s001.pdf]

# Circulatory and Urinary B-Vitamin Responses to Multivitamin Supplement Ingestion Differ Between Older and Younger Adults

Sharma P *et al. Nutrients*

Online Supplementary Material

1

## Supplemental Tables

**Table S1:** Urine output and creatinine concentration of the study participants at fasting and 1-4 h following multivitamin and mineral supplement ingestion.

| Urine                       | Old        |               | Younger     |              | P value |        |           |
|-----------------------------|------------|---------------|-------------|--------------|---------|--------|-----------|
|                             | M          | F             | M           | F            | Age     | Sex    | Age x sex |
| Volume fasting (g)          | 41.1 ± 2.3 | 45.1 ± 4.3    | 46.9 ± 5.6  | 32.1 ± 5.7   | 0.456   | 0.267  | 0.058     |
| Volume 1-4 h (g)            | 408.7 ± 88 | 489.9 ± 113.7 | 469 ± 147.2 | 508.9 ± 83.4 | 0.735   | 0.606  | 0.860     |
| Creatinine fasting (mmol/L) | 11.7 ± 0.9 | 8.4 ± 1.5     | 18.9 ± 3.6  | 17.5 ± 3.7   | 0.005*  | 0.401  | 0.734     |
| Creatinine 1-4 h (mmol/L)   | 7.5 ± 1.2  | 5 ± 1.7       | 8.7 ± 2.2   | 3.2 ± 0.5    | 0.813   | 0.012* | 0.328     |

M: male; F: female. \*, significant main age or sex effects,  $P < 0.05$ .

Values are presented as mean ± SEM (n=20 in each age group with 10 males and 10 females each.)

Statistical analysis was performed using general linear univariate model with age and sex as fixed factors;  $\alpha P < 0.05$ .

# Circulatory and Urinary B-Vitamin Responses to Multivitamin Supplement Ingestion Differ Between Older and Younger Adults

Sharma P *et al. Nutrients*

## Online Supplementary Material

2

**Table S2. Baseline B-vitamin and vitamer concentration in circulation and urine of the study participants measured at fasting.**

| Circulation                          | Older adults              |                            | Younger adults            |                             | Effect             |                    |                    |
|--------------------------------------|---------------------------|----------------------------|---------------------------|-----------------------------|--------------------|--------------------|--------------------|
|                                      | M (n=10)                  | F (n=10)                   | M (n=10)                  | F (n=10)                    | Age                | Sex                | Age x sex          |
| Vitamin B <sub>12</sub> <sup>1</sup> | 351.9 ± 31.9 <sup>a</sup> | 535.4 ± 64.7 <sup>b</sup>  | 569.6 ± 29.7 <sup>b</sup> | 473.2 ± 53.4                | 0.109              | 0.363              | 0.005 <sup>†</sup> |
| Folate <sup>1</sup>                  | 16.5 ± 3.2                | 15.9 ± 1.4                 | 10.1 ± 1.1                | 8.9 ± 1.1                   | 0.001 <sup>*</sup> | 0.689              | 0.878              |
| Pyridoxine                           | 0.2 ± 0.1                 | 0.2 ± 0.0                  | 0.3 ± 0.2                 | 0.1 ± 0.0                   | 0.506              | 0.333              | 0.352              |
| Pyridoxal                            | 9.2 ± 3.2                 | 4.6 ± 1.5                  | 10.1 ± 1.5                | 11.6 ± 2.9                  | 0.108              | 0.520              | 0.217              |
| Pyridoxamine                         | 1.0 ± 0.2                 | 0.9 ± 0.3                  | 1.2 ± 0.2                 | 0.6 ± 0.2                   | 0.988              | 0.116              | 0.247              |
| PLP                                  | 2.1 ± 1.6                 | 1.0 ± 0.3                  | 1.1 ± 0.5                 | 2.7 ± 1.9                   | 0.822              | 0.864              | 0.298              |
| 4-pyridoxic acid                     | 20.7 ± 5.6                | 21.9 ± 2.2                 | 16.6 ± 2.3                | 17.1 ± 3.2                  | 0.222              | 0.819              | 0.916              |
| Thiamine                             | 1.3 ± 0.4                 | 2 ± 0.3                    | 0.5 ± 0.1                 | 0.6 ± 0.2                   | 0.001 <sup>*</sup> | 0.161              | 0.276              |
| Pantothenic acid                     | 113.3 ± 4.1 <sup>a</sup>  | 169.5 ± 22.1 <sup>b</sup>  | 124.3 ± 13.1              | 106.6 ± 12.3 <sup>a</sup>   | 0.080              | 0.189              | 0.014 <sup>†</sup> |
| Riboflavin                           | 18.1 ± 2.3                | 17.9 ± 2.5                 | 10.1 ± 1.1                | 20.1 ± 5.1                  | 0.352              | 0.127              | 0.108              |
| FMN                                  | 4.4 ± 0.9                 | 6.9 ± 1.2                  | 7.7 ± 1.6                 | 8.6 ± 1.5                   | 0.064              | 0.186              | 0.520              |
| Nicotinic acid                       | 1.7 ± 0.4                 | 2.1 ± 0.4                  | 2.5 ± 1.2                 | 2.3 ± 0.4                   | 0.512              | 0.896              | 0.667              |
| Nicotinamide                         | 331.1 ± 63.7              | 503.6 ± 68.4               | 641.3 ± 266.7             | 724.2 ± 74.5                | 0.078              | 0.388              | 0.761              |
| Nicotinuric acid                     | 582.4 ± 145.6             | 196.7 ± 48.2 <sup>a</sup>  | 358.6 ± 90.1              | 778.4 ± 262.5 <sup>b</sup>  | 0.267              | 0.915              | 0.016 <sup>†</sup> |
| <b>Urine</b>                         |                           |                            |                           |                             |                    |                    |                    |
| Folic acid                           | 0.4 ± 0.1                 | 0.9 ± 0.4                  | 0.3 ± 0.1                 | 0.8 ± 0.4                   | 0.715              | 0.093              | 0.984              |
| Pyridoxine                           | 0.1 ± 0.0                 | 0.1 ± 0.0                  | 0.1 ± 0.0                 | 0.1 ± 0.0                   | 0.116              | 0.395              | 0.501              |
| Pyridoxal                            | 250.8 ± 45.3              | 332.7 ± 39.5               | 244.8 ± 50.7              | 343.5 ± 71.0                | 0.964              | 0.097              | 0.875              |
| Pyridoxamine                         | 4.5 ± 0.3                 | 4.9 ± 0.5                  | 3.4 ± 0.3                 | 5.1 ± 0.4                   | 0.341              | 0.089              | 0.280              |
| PLP                                  | 32.2 ± 15.4               | 125.9 ± 60.2               | 13.4 ± 6.7                | 423.2 ± 281.5               | 0.234              | 0.01 <sup>*</sup>  | 0.091              |
| 4-pyridoxic acid                     | 2316.4 ± 834.0            | 1938.8 ± 174.6             | 1451.7 ± 149.2            | 2195.6 ± 546.3              | 0.556              | 0.722              | 0.280              |
| Thiamine                             | 40.5 ± 7.9                | 46.8 ± 8.0                 | 40.5 ± 6.1                | 34.0 ± 6.9                  | 0.383              | 0.994              | 0.385              |
| Pantothenic acid                     | 1890.9 ± 85.5             | 3363.5 ± 454.4             | 1697.2 ± 391.0            | 2433.0 ± 500.7              | 0.161              | 0.008 <sup>*</sup> | 0.355              |
| Riboflavin                           | 323.1 ± 56.7              | 352.4 ± 63.2               | 149.9 ± 27.8              | 227.5 ± 74.8                | 0.015 <sup>*</sup> | 0.365              | 0.681              |
| FMN                                  | 241.8 ± 32.1              | 288.1 ± 49.5               | 187.9 ± 16.9              | 248.0 ± 41.2                | 0.212              | 0.159              | 0.853              |
| Nicotinic acid                       | 65.4 ± 5.7                | 100.0 ± 18.2               | 34.6 ± 3.8                | 59.6 ± 10.4                 | 0.003 <sup>*</sup> | 0.01 <sup>*</sup>  | 0.664              |
| Nicotinamide                         | 772.5 ± 30.6              | 731.4 ± 81.7               | 611.6 ± 45.0 <sup>a</sup> | 834.9 ± 71.7 <sup>b</sup>   | 0.64               | 0.143              | 0.036 <sup>†</sup> |
| Nicotinuric acid                     | 995.9 ± 254.6             | 414.4 ± 107.9 <sup>a</sup> | 336.5 ± 96.8 <sup>a</sup> | 1540.2 ± 478.8 <sup>b</sup> | 0.412              | 0.275              | 0.003 <sup>†</sup> |
| Biotin                               | 12.3 ± 0.6                | 19.5 ± 2.2                 | 13.6 ± 1.9                | 22.4 ± 7.2                  | 0.589              | 0.047 <sup>*</sup> | 0.851              |

Values are means ± SEMs of concentrations in circulation (nmol/L) or urine (nmol/mmol creatinine), except otherwise stated. Circulatory <sup>1</sup>vitamin B<sub>12</sub> (pg/mL) and folate (mg/mL) were measured in serum, the rest in plasma samples folic acid and biotin were only detected in urine. Data were compared using general linear multivariate analysis of variance with age and sex as fixed factors. Sidak post-hoc test was applied for pairwise comparisons if significant age x sex interaction was present. Significant age x sex interaction ( $p < 0.05$ ) is indicated by "†", main effects are indicated by "\*". Different superscript letters within a row indicate significantly different values between groups ( $p < 0.05$ ). M, males; F, females.

# Circulatory and Urinary B-Vitamin Responses to Multivitamin Supplement Ingestion Differ Between Older and Younger Adults

Sharma P *et al. Nutrients*

## Online Supplementary Material

3

Supplemental Figure 1.

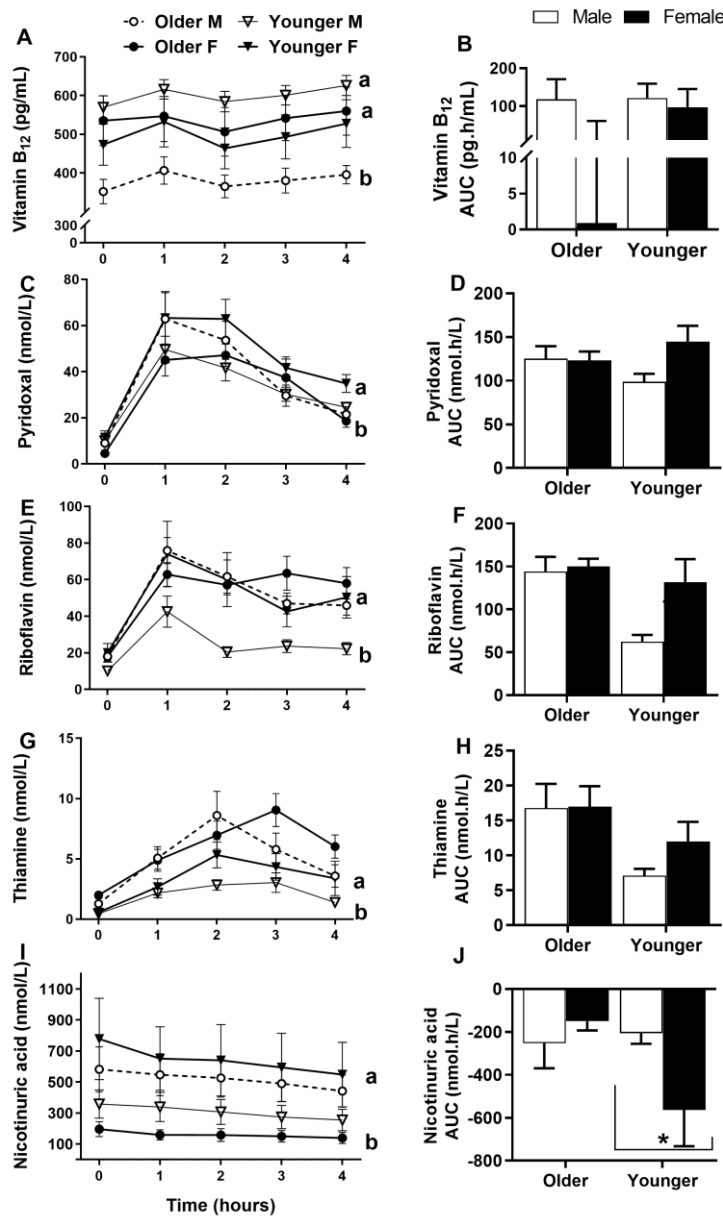

**Figure S1.** Postprandial circulating B-vitamin concentrations with sex-specific effects in the older and younger adults following a multivitamin and mineral supplement ingestion. The panel on the left represents the time response concentration curves at each study time points including at fasting (Time=0 hour) and the right panel are the incremental area under the curves (iAUC) for the respective vitamins, (AB) serum vitamin B<sub>12</sub>, (CD) pyridoxal, (EF) riboflavin, (GH) thiamine and (IJ) nicotinuric acid. Different alphabetical letters indicate a statistically significant difference ( $P = 0.05$ ) between the groups indicated and asterisks (\*) indicate the difference in the 4-hour iAUC between age or sex groups.

Supplemental Figure 2.

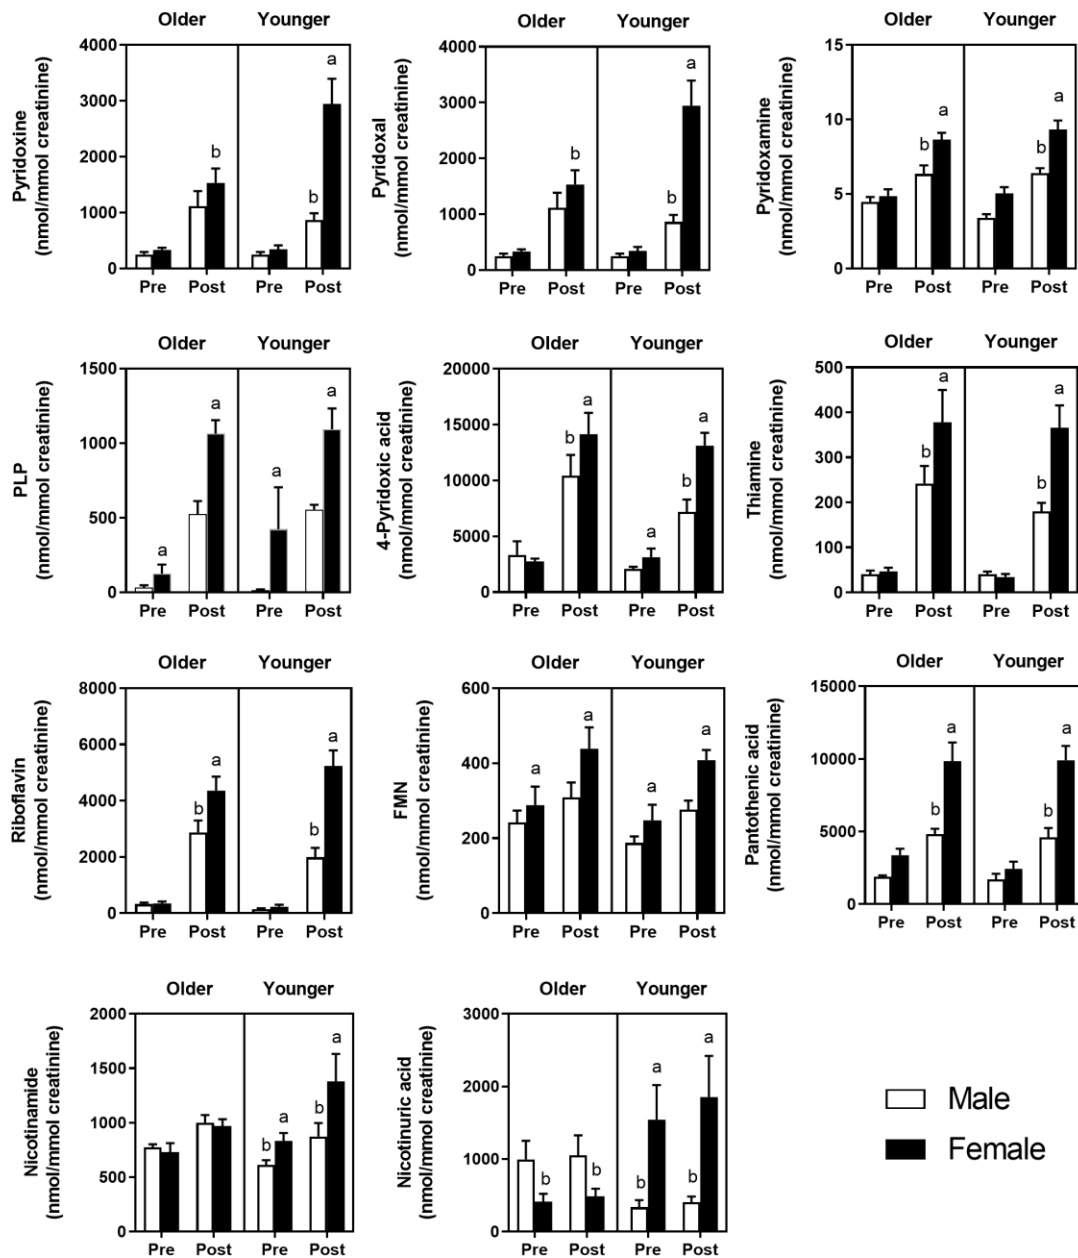

**Figure S2.** Sex - specific effects on the urinary concentrations of B-vitamins and vitamers before (pre) and after (post) multivitamin supplement ingestion. Different alphabetical letters indicate significant differences with interactions (time x age x gender,  $P < 0.05$ ) between or within age groups as indicated, whereas similar letters indicate a main sex effect ( $P = 0.05$ ) on vitamin concentration.
